# Supplementary material for: A Comprehensive Profiling of Cellular Sphingolipids in Mammalian Endothelial and Microglial Cells Cultured in Normal and High-Glucose Conditions
Source: MDPI journal article supplement (doi:10.3390/cells11193082), 2022-09-30
Supplement: s1 [file s1]

# A Comprehensive Profiling of Cellular Sphingolipids in Mammalian Endothelial and Microglial Cells Cultured in Normal and High-Glucose Conditions

Figure S1:

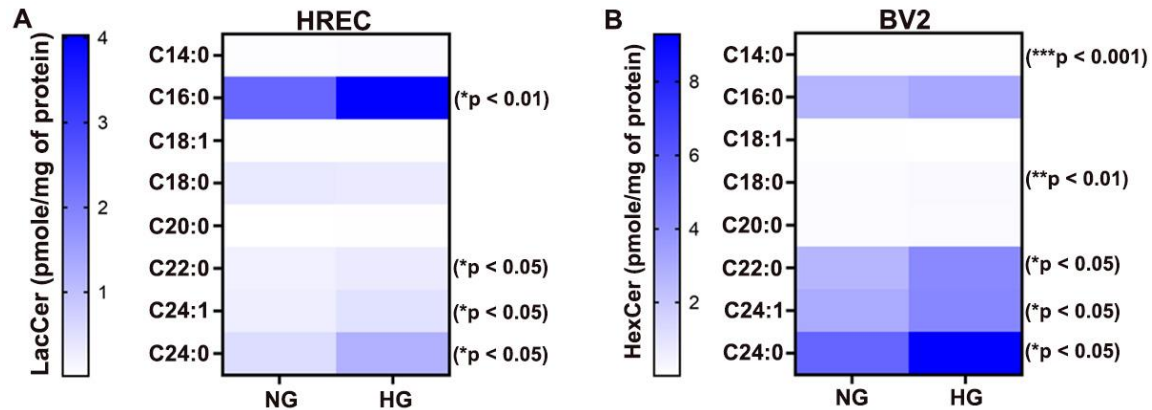

**Figure S1:** Heat map of Glycosphingolipids in high glucose-cultured HREC and BV2 cells. Different carbon chains of Lactosyl-Ceramide (LacCer) (pmole/mg protein) in Normal glucose (NG) and High glucose (HG)-cultured HREC (A). Different carbon chains of Hexosyl-Ceramide (HexCer) (pmole/mg protein) in NG and HG-cultured BV2 (B). \*p < 0.05, \*\*p < 0.01, \*\*\*p < 0.001, Mean  $\pm$  SEM, n=6.

**Figure S2:**

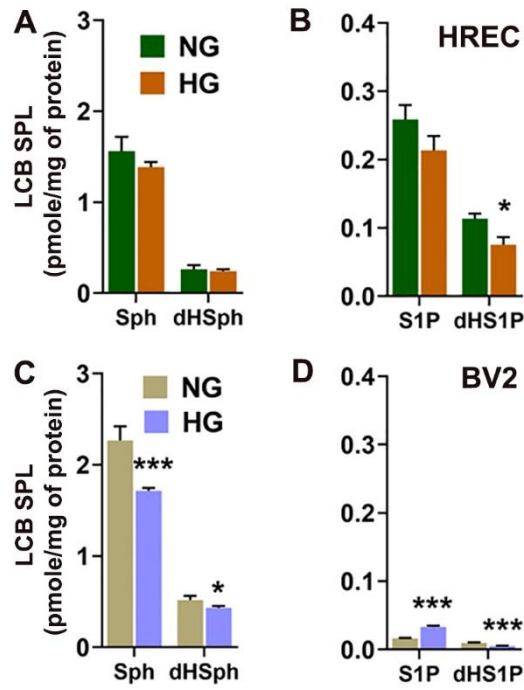

**Figure S2:** Analysis of different Long Chain Base (LCB) Sphingolipid (SPL) classes in high glucose cultured HREC and BV2 cells. Levels of LCB-SPL (Sphingosine, Sph; dihydrosphingosine, dHSph; sphingosine-1-phosphate, S1P and dihydro S1P, dHS1P) (pmole/mg protein) in Normal Glucose (NG) and High glucose (HG)-cultured HREC (A, B) and BV2 (C, D). \* $p < 0.05$ , \*\*\* $p < 0.001$ , Mean  $\pm$  SEM,  $n=6$ .

Figure S3:

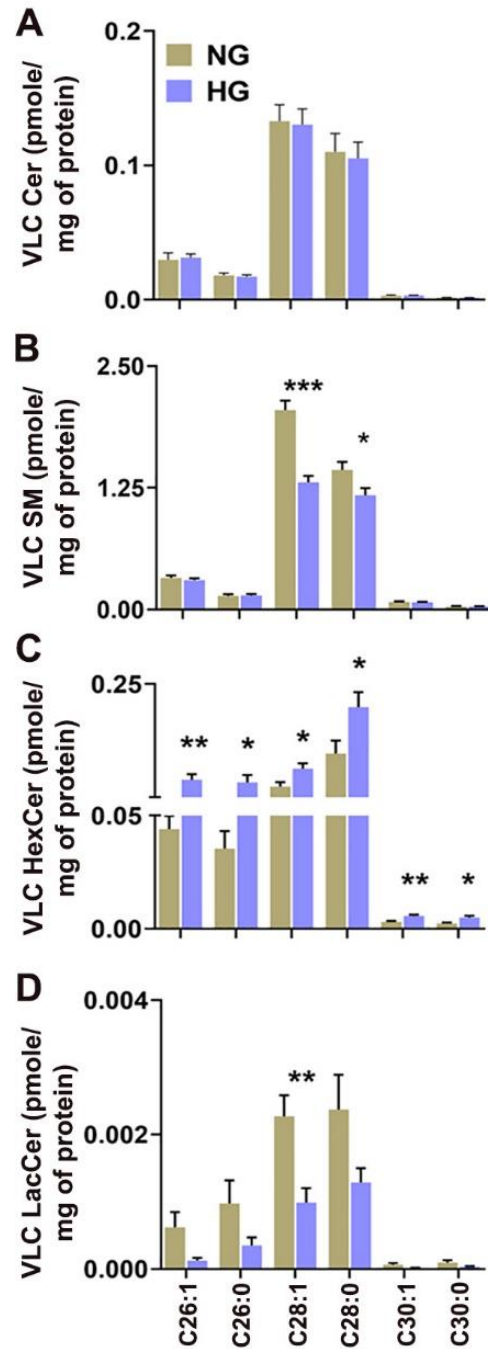

**Figure S3:** Analysis of different Very Long Chain (VLC) Sphingolipid classes of high glucose-cultured BV2 cells. Total concentration (pmole/mg protein) of different carbon chain length of VLC Ceramide (VLC Cer) (**A**), VLC Sphingomyelin (VLC SM) (**B**), VLC Hexosyl-Ceramide (VLC HexCer) (**C**), VLC Lactosyl-Ceramide (VLC LacCer) (**D**) in normal glucose (NG) and high glucose (HG) cultured cells. \* $p < 0.05$ , \*\* $p < 0.01$ , \*\*\* $p < 0.001$ , Mean  $\pm$  SEM,  $n=6$ .

**Supplementary Table S1: Primers used and their sequences for HREC (Human origin)**

| Name of Genes  | Sequences                                                                      |
|----------------|--------------------------------------------------------------------------------|
| <i>B4GALT5</i> | Forward: CCAGAGGGTGACACAGGAAA<br>Reverse: GGCGTCGTATGTGATGTTTG                 |
| <i>B4GALT6</i> | Forward: AAGTGGGCTGACAGTGGAAC<br>Reverse: CTGACGCTCCTTGAATACC                  |
| <i>CERS2</i>   | Forward: TCTATATCACGCTGCCCTG<br>Reverse: CTTGCCACTGGTCAGGTAGA                  |
| <i>CERS4</i>   | Forward: GCATTGAGGACTTTCCTTACCT<br>Reverse: ACCACTCGTTGAAACTGGAC               |
| <i>ELOVL4</i>  | Forward: TCCAGAAATATCTTTGGTGG<br>Reverse: GTTAAGGCCCAGTTCAATT                  |
| <i>SMPD1</i>   | Forward: GAAGAGCTGGAGCTGGAATTA<br>Reverse: CTGGGTCAGATTCAGGATGTAG              |
| <i>SMPD2</i>   | Forward: CTT ACC CAG CAC ATC TAC ACT C<br>Reverse: AGC ACG TAG TCA ATG CGG ACA |
| <i>SPHK1</i>   | Forward: AGCACCGATAAGGAGCTGAA<br>Reverse: AGATTCAGCCTCAGCCAAA                  |
| <i>SPHK2</i>   | Forward: TTCCGGAAGAAAGGGATCT<br>Reverse: TAGGCTGGTAGGAGCAAGGA                  |
| <i>SPTLC1</i>  | Forward: AGGGATTCTGATCCTCTGGATA<br>Reverse: GTTGCCACTCTTCAATCAGTTC             |
| <i>SPTLC2</i>  | Forward: TATGGAGCTGGAGTGTGCAG<br>Reverse: GCCAACAAGAGCAGGAATGT                 |
| <i>ICAM1</i>   | Forward: ATTCCCAGCAGACTCCAATG<br>Reverse: GGCTGCTACCACAGTGATGA                 |
| <i>PECAM1</i>  | Forward: TGAGGGTGAAGGTGATAGCC<br>Reverse: GGGTTTGCCCTCTTTTCTC                  |
| <i>VEGFA</i>   | Forward: ATCTTCAAGCCGTCCTGTGT<br>Reverse: AAATGCTTTCTCCGCTCTGA                 |
| <i>IL6</i>     | Forward: ACTCACCTCTTCAGAACGAA<br>Reverse: GAAGCATCCATCTTTTTCAG                 |
| TNF $\alpha$   | Forward: CTTCTGGCTCAAAAAGAGAA<br>Reverse: GTCAGGGATCAAAGCTGTAG                 |
| IL18           | Forward: AATAAAGATGGCTGCTGAAC<br>Reverse: CCTTGGTCAATGAAGAGAAC                 |
| RPL19          | Forward: TCACAGCCTGTACCTGAAGG<br>Reverse: TCGTGCTTCCTTGGTCTTAG                 |
| GAPDH          | Forward: TGAAGGTCGGAGTCAAGGG<br>Reverse: AGAGTTAAAAGCAGCCCTGGTG                |

**Supplementary Table S2: Primers used and their sequences for BV2 (Rodent origin)**

| Name of the Genes              | Sequence (5'-3')                                               |
|--------------------------------|----------------------------------------------------------------|
| <i>CerS2</i>                   | Forward: GAACGACTATGGCTGCCTGT<br>Reverse: AGGGGTGTTGCCACATAAAG |
| <i>CerS4</i>                   | Forward: TGGTTACCACCCAATGTCAC<br>Reverse: TGGACACTGCTTCATCCTGA |
| <i>Gcs</i>                     | Forward: GCCATGCAAACTCTGGTTC<br>Reverse: TGGACACCCCTGAGTTGAAT  |
| <i>Sptlc1</i>                  | Forward: TTTCCGGTTTAAAAGTGGTG<br>Reverse: CTGATGCTTGGAGGAGGAAG |
| <i>Sptlc2</i>                  | Forward: CATTGAGTCCAGAGCCAGAT<br>Reverse: ACACACTGTCCTGGGAGGAA |
| <i>Sphk1</i>                   | Forward: GATGCATGAGGTGGTGAATG<br>Reverse: AACAGCAGTGTGCAGTTGAT |
| <i>Sphk2</i>                   | Forward: GAAGGCATTGTCACTGTGTC<br>Reverse: GCAGAGAAGAAGCGAGCAGT |
| <i>Smpd1</i>                   | Forward: CAGTTCTTTGGCCCACTCA<br>Reverse: TCCGGGGTAGTTTCCATCTA  |
| <i>Smpd2</i>                   | Forward: ACGTGCTTTACAAGGCAGTC<br>Reverse: AGGACACACAGCAACACCAG |
| <i>Icam1</i>                   | Forward: TCAAACGGGAGATGAATGGT<br>Reverse: AGTTTTAGGGCCTCCTCCTG |
| <i>Pecam1</i>                  | Forward: ATGACCCAGCAACATTCACA<br>Reverse: TCGACAGGATGGAAATCACA |
| <i>Vegfa</i>                   | Forward: ATCTTCAAGCCGTCCTGTGT<br>Reverse: AAATGCTTTCTCCGCTCTGA |
| <i>IL-6</i>                    | Forward: TGTGCAATGGCAATTCTGAT<br>Reverse: GGAAGTTGGGGTAGGAAGGA |
| <i>IL-18</i>                   | Forward: CAGCCTGTGTTGAGGATATG<br>Reverse: TCACAGCCAGTCCTCTTACT |
| <i>Tnf-<math>\alpha</math></i> | Forward: CTCAAACTCGAGTGACAAGC<br>Reverse: GTGGGTGAGGAGCACGTAGT |
| <i>Rpl19</i>                   | Forward: TCACAGCCTGTACCTGAAGG<br>Reverse: TCGTGCTTCCTTGGTCTTAG |
| <i>Gapdh</i>                   | Forward: CTGAACGGGAAGCTCACTG<br>Reverse: ACCACCCTGTTGCTGTAGC   |
